# Supplementary material
Source: Springer Nature journal article supplement (https://www.springermedizin.de/resource/supplementary/12881_2007_276_MOESM1_ESM.pdf/9452790)

**I**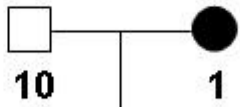**II**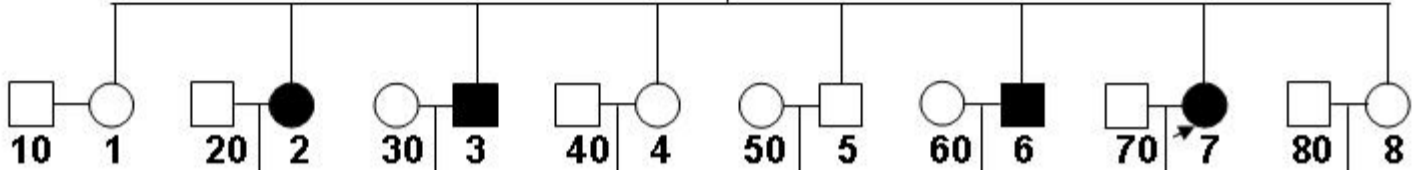**III**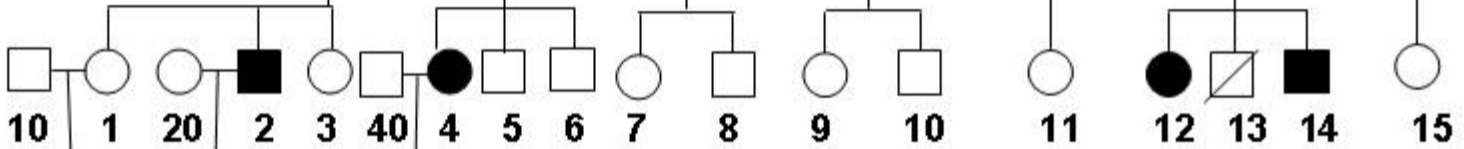**IV**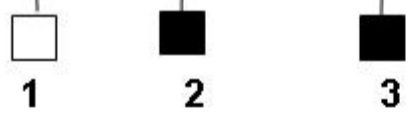

Supplement: MOESM1 [file 9452790]
